# Supplementary material
Source: PubMed Central journal article supplement (PMC7072004)

# Supplemental Figure 1

## Dose finding studies of AREG treatment and the effect of other ligands. A

Phosphorylated Akt (Ser473) levels at different time points. shControl HCM were exposed to 16 hours of hypoxia and subsequently given 20 nM AREG in normoxia for 0, 5, 10, 20, 30 and 60 minutes (1h). Total Akt is shown. **B** pAkt (Ser473) levels after 10, 20, and 40 nM concentrations of AREG treatment. Total Akt is shown.

**A**

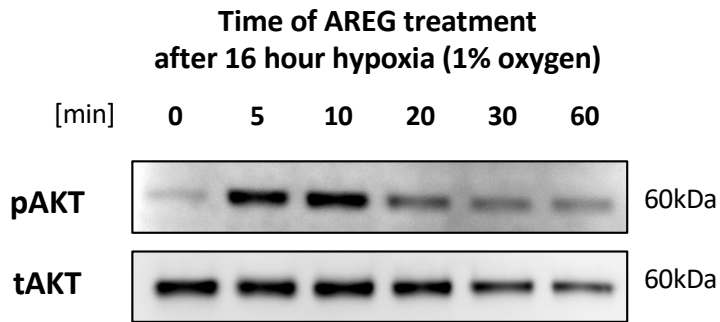

**B**

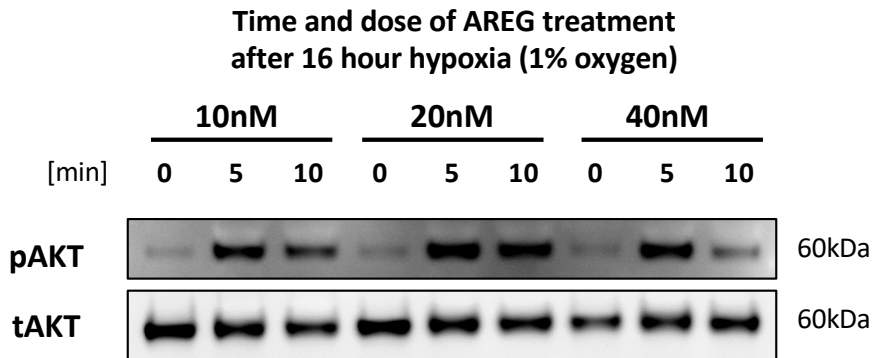

Supplement: NIHMS1549179-supplement-Supplemental_Digital_Content_1-1.pdf [file NIHMS1549179-supplement-Supplemental_Digital_Content_1-1.pdf]
