# Supplementary material
Source: PubMed Central journal article supplement (PMC7072004)

## Supplemental Figure 2

Post hoc analysis of Figures 2E, 3D, 3F and 7E. **2E** *ErbB1* transcript levels comparing no ischemia (-I) and 45 minutes' ischemia (+I) in the Area-at-Risk (AAR) (n=8 per group).  $t=-0.09$ ,  $df=12$  **3D** *ErbB1* transcript levels comparing no ischemia (-I) and ischemia (+I) in the AAR in Myosin Cre<sup>+</sup> and *Hif2a*<sup>loxP/loxP</sup> Myosin Cre<sup>+</sup> mice. Mice underwent no ischemia or 45 minutes of ischemia by total occlusion of the LCA. Heart samples were collected from  $n \geq 6$  mice per group.  $F_{3,25}=0.47$ ,  $p=0.707$  **3F** Densitometry of ERBB1 western blots ( $n \geq 6$  per group).  $F_{3,23}=3.05$ ,  $p=0.049$  **7E** Densitometry of phosphorylated Akt western blot, which is expressed as a ratio of phosphorylated Akt to total Akt (pAkt/tAkt) ( $n \geq 4$  per group).  $F_{3,22}=1.98$ ,  $p=0.147$

**2E**

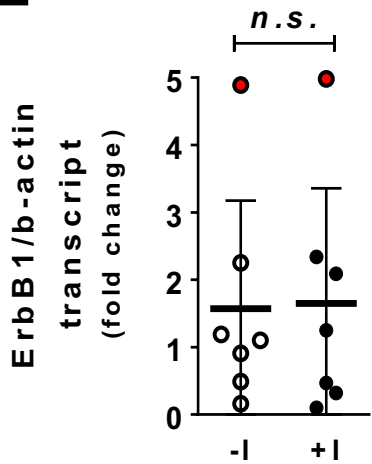

**3D**

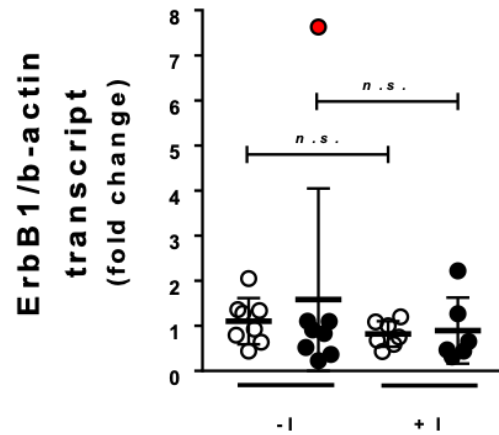

**3F**

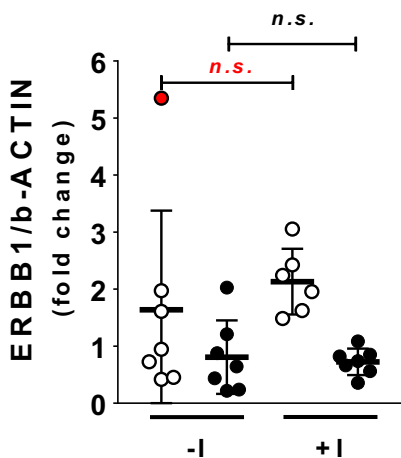

**7E**

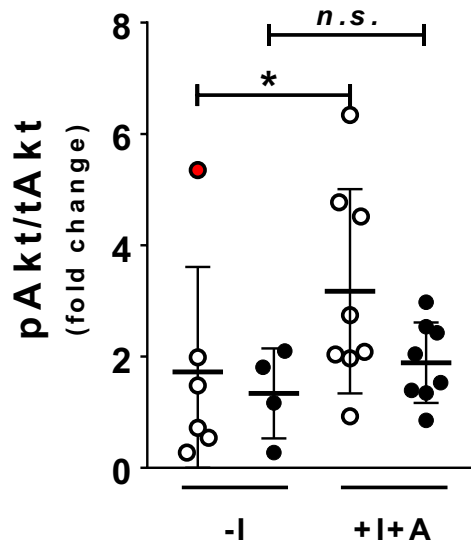

Supplement: NIHMS1549179-supplement-Supplemental_Digital_Content_2.pdf [file NIHMS1549179-supplement-Supplemental_Digital_Content_2.pdf]
